# Supplementary material
Source: HighWire-hosted journal article supplement (https://bmjopenrespres.bmj.com/content/7/1/e000736)
Supplement: inline-supplementary-material-1 [file inline-supplementary-material-1.xlsx]

## Sheet: Tabelle1
Age at assessment [yr]	Gender	diagnosis	airways	intestine	hepatobiliary	fertility	family history	other	CFTR genotype	Sweat chloride [mmol/L]	Date of assessment nPD	Right	basal [mV]	Δami [mV]	ΔCl-free/Iso [mV]	Left	basal [mV]	Δami [mV]	ΔCl-free/Iso [mV]	Date of assessment ICM	ICM	carbachol-1	Forsk/IBMX-1	carbachol-1	histamine-1	carbachol-2	Forsk/IBMX-2	carbachol-2	histamine-2	carbachol-3	Forsk/IBMX-3	carbachol-3	histamine-3	carbachol-4	Forsk/IBMX-4	carbachol-4	histamine-4
0.4	m	non-CF	chronic cough	PS, pancreas elastase > 500, BMI 16.0				dwarfism, failure to thrive	WT / WT	15, 39, 52		nostril				nostril				2017-09-05	[µA/cm2]	131	54	129	76	22	33	16	21	94	55	99	115	n.a.
1.2	m	non-CF	recurrent obstructive bronchitis	PS, pancreas elastase > 500, pancreas lipomatosis, BMI 16					WT / WT	26		nostril				nostril				2015-03-18	[µA/cm2]		104	82	12		19	18	38		77	16	49		78	74	46
1.4	m	PS CF	obstructive bronchitis, chronic cough	PS, pancreas elastase > 500					p.Phe508del/p.Asp579His	52, 38, 32, 37, 35		nostril				nostril				2014-12-03	[µA/cm2]		18	0	0		16	0	0
1.7	m	non-CF	RSV-bronchiolitis, chronic cough	PS, pancreas elastase > 500	cholecystolithiasis				WT / WT	10, 8	2017-03-23	nostril				nostril				2017-03-23	[µA/cm2]	86	49	78	81	166	22	43	66	118	14	47	143	80	21	81	81
1.8	m	non-CF	chronic cough	PS, pancreas elastase > 500				preterm baby, failure to thrive	WT / WT	51, 73										2020-01-29	[mA/cm2)	72	38		86	54	20		31	61	26		68
2	m	CFTR-RD	chronic bronchitis	steatorrhea, pancreas elastase > 500				failure to thrive	WT / WT	10.11		nostril				nostril				2015-09-02	[µA/cm2]		3	-12	-2		23	27	8		3	4	20
2	m	non-CF	asthma bronchiale	PI, pancreas elastase < 50, underweight				dystrophy	WT / WT	31, 34		nostril				nostril				2018-04-10	[µA/cm2]	24	18	36	34	40	19	42	38	38	24	40	45
2.1	m	non-CF	bronchiolitis, recurrent pneumonias, asthma bronchiale	PI, BMI 14.1: underweight, pancreas elastase < 50					WT / WT	20, 25		nostril				nostril				2018-05-23	[µA/cm2]	11	21	29	33
2.7	f	CFTR-RD	chronic cough, chronic bronchitis, FVC 84%, FEV1 89%	PS, pancreas elastase > 500, BMI 14.2, abdominal pain					p.Phe508del / WT	50		nostril				nostril				2015-08-05	[µA/cm2]		24	4	17		30	16	17		11	5	18		17	6	18
2.9	m	CFTR-RD	normal	PS, pancreas elastase > 500, often diarrhoea, abdominal pain					WT / WT	61, 50, 42		nostril				nostril				2018-11-09	[µA/cm2]	11	3	7	14		n.a.				n.a.
3	m	non-CF	recurrent obstructive bronchitis	PS, pancreas elastase > 500, BMI 18.0					WT / WT	34, 34										2019-11-09	[µA/cm2]	13	85	33		6	25	27		7	27	37
3.1	m	PS CF	recurrent bronchitis, normal lung function (FVC 101%, FEV1 112%)	PS, pancreas elastase > 500			brother PS CF	episodes of salt loss with alkalosis	p.Phe508del/p.Arg74Trp-Val201Met-Asp1270Asn	44		nostril				nostril				2012-11-20	[µA/cm2]		44	1	0		16	1	0		30	0	0		58	1	0
3.1	m	CFTR-RD	obstructive bronchitis, recurrent lower airway infections	PS, pancreas elastase 337	normal sonogram				p.Arg117His-c.1210-12T(7) / p.Arg117His-c.1210-12T(7)	42, 34, 42, 41		nostril				nostril				2013-03-13	[µA/cm2]		43	86	61		35	55	43		20	75	85		7	44	74
3.3	m	non-CF	normal	PS, pancreas elastase > 500					p.Phe508del / WT	64	2016-08-26	nostril				nostril				2016-08-26	[µA/cm2]		18	52	58		9	31	37	10	44	39
3.4	f	CFTR-RD	frequent upper airway infections	PS, pancreas elastase variable 211, >500					p.Leu159Ser / c.1210-12T(5)	41		nostril				nostril				2013-08-21	[µA/cm2]		68	154	34		4	6	5		10	14	12
3.8	m	non-CF	normal, no airway infection, no prescription of antimicrobials	normal, no abdominal pain				dilatative cardiomyopathia, heart transplant recipient	p.Phe508del / p.Tyr919Cys	50, 80, 72, 79		nostril				nostril				2012-11-27	[µA/cm2]		87	74	27		31	64	27		63	74	17		21	33	10
3.9	m	non-CF	chronic cough	PS, pancreas elastase > 500				epidymiditis	WT / WT	60, 62	2011-01-13	nostril	-13	14	-25	nostril	-18	4	-6		[µA/cm2]
4	m	non-CF	recurrent bronchitis	PS, pancreas elastase > 500				preterm baby	p.Phe508del / WT	37		nostril				nostril				2015-10-26	[µA/cm2]		46	177	182		51	173	170		97	147	161
4	m	non-CF	chronic bronchitis	PS, pancreas elastase > 500				preterm baby	P.Phe508del /WT	53		nostril				nostril				2015-10-26	[µA/cm2]		93	173	118		24	24	45		120	205	229	52	234	254	540
4	m	non-CF		rectal polyps, PS, pancreas elastase > 500					p.Gln1053Ter / p.Asp1152His	21, 22, 23		nostril				nostril				2014-11-05	[µA/cm2]		58	104	101		19	43	96	n.a.				n.a.
4	f	non-CF	recurrent bronchitis and pneumonia	PS, pancreas elastase > 500					WT / WT	33,20,44	2010-08-18	nostril	-13			nostril	-15				[µA/cm2]
4.1	f	CFTR-RD	recurrent obstructive bronchitis	PS, pancreas elastase > 500					WT / WT	70.66		nostril				nostril				2014-03-26	[µA/cm2]		22	25	36	n.a.					2	13	14		14	12	13
4.3	f	PI CF	sinusitis, recurrent bronchitis, colonization with P. aeruginosa, impaired lung function (FVC 78%, FEV1 72%, LCI 9.0)	PI, steatorrhea, pancreas elastase < 50				dystrophy	p.Phe508del / WT	97		nostril				nostril				2017-12-13	[µA/cm2]	4	-5	-1	-6	-1	-5	0	7	4	3	4	-6	4	-5	-5	-6
4.3	m	non-CF		PI, BMI 15.6, pancreas elastase 60, 170, < 50, <15					WT / WT (no mutations in SBDS gene)	3, 9		nostril				nostril				2018-11-27	[µA/cm2]	83	6	44	50	38	11	105	58	23	18	40	14	18	44	28	n.a.
4.5	m	PS CF	chronic cough, bronchiectasis	PS					p.Phe508del / p.Asp1152His	29		nostril				nostril				2017-09-13	[µA/cm2]	4	57	17	16	3	14	10	4	11	4	1	15	5	9	5	2
4.7	m	CFTR-RD	recurrent bronchitis	PS, pancreas elastase > 500				preterm baby	p.Phe508del/ p.Ser977Phe-c.1210-12T(5)	35, 38		nostril				nostril				2018-06-26	[µA/cm2]		22	20	20		9	15	11		5	11	12		28	30	19
4.8	f	CFTR-RD	chronic bronchial obstruction, recurrent bronchitis	recurrent abdominal pain, PS, pancreas elastase > 500					WT / WT	32.83		nostril				nostril				2014-07-16	[µA/cm2]		6	12	5		9	10	2		13	11	5	n.a.
4.8	m	non-CF	repetitive lower airway infections in early childhood	PS, pancreas elastase 443, > 500, > 500, > 500, > 500, BMI 15.0				preterm baby	c.4272C>T (neutral polymorphism Y1424Y) / WT	7, 12, 12		nostril				nostril				2015-04-15	[µA/cm2]		26	33	28		38	106	71		23	74	56	n.a.
4.8	m	non-CF	normal	normal pancreas elastase	normal sonogram			mitral valve defect, anomalous limb and facies, hexadactyly, retardation, dwarfism	WT / WT	79, 92, 93		nostril				nostril				2013-03-06	[µA/cm2]		37	41	21		14	75	49		42	156	57		54	158	67
5	m	non-CF	asthma, obstructive lung disease	PS, pancreas elastase 478					3849+10kbC>T / WT	17	2010-10-14	nostril	-12	4	-14	nostril	-10	5	-9		[µA/cm2]
5	f	non-CF	recurrent bronchitis, recurrent pneumonias	PS, pancreas elastase 462					p.Arg75GIn / p.Val302Met	40.34		nostril				nostril				2016-09-21	[µA/cm2]		20	37	107		18	64	68	n.a.				n.a.
5.1	f	non-CF	allergy, frequent lower airway infections in early childhood	PS, pancreas elastase > 500					c.-8G>C (5`UTR) / c.-8G>C (5`UTR)	31.33		nostril				nostril				2014-11-26	[µA/cm2]		31	17	10		59	103	96		44	119	89	n.a.
5.1	f	non-CF		PS, pancreas elastase > 500, BMI 12.9				preterm baby, dystrophy, failure to thrive	WT / WT	33, 32		nostril				nostril				2014-06-18	[µA/cm2]		13	70	31		17	87	62	n.a.				n.a.
5.2	m	CFTR-RD	nasal polyps, normal lung function (FVC 96%, FEV1 97%)	PS, pancreas elastase > 500			brother PS CF		p.Phe508del/p.Arg74Trp-Val201Met-Asp1270Asn	45		nostril				nostril				2017-04-19	[µA/cm2]		22	85	33		31	79	55		10	22	17		69	136	89
5.3	f	non-CF	obstructive bronchitis, chronic cough	BMI 15.1, pancreas elastase > 500, PS					WT / WT	25		nostril				nostril				2018-04-11	[µA/cm2]		4	17	27		55	21	19		37	91	90
5.5	f	non-CF	chronic cough, sinusitis, asthma bronchiale	abdominal pain, PS, pancreas elastase > 500					WT / WT	13, 14	2020-01-13	nostril	-17	8	-10	nostril	-17	6	-13		[µA/cm2]
5.6	m	non-CF		recurrent rectal prolaps, often diarrhea, BMI 21.9					WT / WT	49		nostril				nostril				2018-11-29	[µA/cm2]	20	35	40	58	24	20	22	53	n.a.				n.a.
5.7	m	non-CF	frequent airway infections	PI, underweight, dystrophy				dwarfism	WT / WT	9		nostril				nostril				2015-07-15	[µA/cm2]		34	250	129		14	136	64		41	153	50	n.a.
5.7	f	non-CF	trachea malacia,	PS, pancreas elastase > 500					p.Arg117His / WT	44.34		nostril				nostril				2013-12-04	[µA/cm2]		20	35	31		18	77	61
5.9	m	non-CF	allergy	underweight, BMI 13.2, pancreas elastase intermittently reduced				failure to thrive	p.Phe508del / WT	41, 46, 49, 49		nostril				nostril				2012-09-18	[µA/cm2]		20	46	44		27	52	41		81	54	36		27	108	34
6	m	CFTR-RD	often cough and some sputum expectoration, normal lung function /FVC 108%, FEV1 118%, LCI 6.8)	PS, often abdominal pain, BMI 21.1, pancreas elastase 450					c.1210-12T(5) / WT	24, 34, 34, 29	2015-10-13	nostril	-33	11	-1	nostril	-35	17	-9	2015-12-01	[µA/cm2]		27	16	35		40	40	64		6	20	13		20	41	31
6.1	f	non-CF		PS, abdominal pain, dystrophy (pancreas elastase > 500)					WT / WT	30, 44	2011-03-11	nostril	-9			nostril	-9				[µA/cm2]
6.5	m	non-CF	chronic cough	PS, pancreas elastase > 500					WT / WT	34.46		nostril				nostril				2014-10-15	[µA/cm2]		51	112	72		85	140	125		165	275	518		41	74	50
6.6	m	non-CF	allergy, asthma bronchiale, recurrent bronchitis, chronic cough	BMI 16.4, PS, pancreas elastase > 500					WT / WT	< 30	2016-01-11	nostril	-27	13	-10	nostril	-21	9	-10		[µA/cm2]
6.7	m	non-CF	chronic cough, chronic bacterial bronchitis	BMI 15.4, PS, pancreas elastase > 500					WT / WT	11	2016-01-18	nostril	-20	16	-15	nostril	-18	14	-16		[µA/cm2]
6.7	f	non-CF	allergy, obstructive bronchitis, colonization with S. aureus, normal lung function (FVC 92%, FEV1 114%)	PS, pancreas elastase > 500					WT / WT	32, 60, 78, 50	2010-06-16	nostril	-19	6	-16	nostril	-21	5	-19		[µA/cm2]
7.1	m	non-CF		PS, pancreas elastase > 500					WT / WT	33	2013-03-14	nostril	-20	13	-19	nostril	-21	10	-12		[µA/cm2]
7.2	m	non-CF		PS, pancreas elastase > 500				valvular aortic stenosis	WT / WT	30	2017-08-29	nostril	-11	0	-4	nostril	-16	6	-5	2017-09-12	[µA/cm2]		54	108	128		9	13	16		21	70	80		18	60	72
7.3	f	non-CF	chronic bacterial bronchitis, bronchiectasis	PS, pancreas elastase > 500					WT / WT	31	2017-05-09	nostril	-22	6	-9	nostril	-20	7	-13	2017-05-09	[µA/cm2]		31	61	130		23	80	165		22	77	104	n.a.
7.3	f	non-CF	normal lung function	PS, chronic constipation					c.1210-12T(5) / WT	53, 38, 66	2012-11-13	nostril	-13	8	-12	nostril				2012-11-13	[µA/cm2]		4	23	14		n.a.				30	123	82		5	53	28
7.4	f	CFTR-RD		PI, steatorrhea, pancreas elastase reduced					p.Phe508del / c.1210-12T(5)	36, 43, 50	2017-03-16	nostril	-23	7	-7	nostril	-24	6	-4		[µA/cm2]
7.5	f	CFTR-RD	normal lung function (FVC 101%, FEV1 92%, LCI 8.6)	PS, abdominal pain, pancreas elastase > 500					WT / WT	30, 41, 60	2016-02-09	nostril	-22	14	-7	nostril	-23	8	-8		[µA/cm2]
7.5	m	non-CF	allergy, asthma bronchiale, FVC 95%, FEV1 85%	faecal pancreas elastase < 100				preterm baby	WT / WT	48, 47, 50		nostril				nostril				2018-12-05	[µA/cm2]	85	0	46	42	18	0	11	12	146	0	131	119		62	8	50	29
8	m	non-CF	recurrent chronic bronchitis	PS, pancreas elastase > 500				Burkitt lymphoma, partial trisomy 8	WT / WT	8	2011-09-07	nostril	-8	3	-2	nostril	-9	4	-9		[µA/cm2]
8.2	m	non-CF	atopy and allergy, frequent episodes of bronchitis, recurrent pneumonias in early childhood	PS, pancreas elastase > 500				preterm child, retinopathy	p.Phe508del / c.1210-12T(5)	63.55		nostril				nostril				2018-10-12	[µA/cm2]	10	4	3	4	12	46	5	30	32	46	44	23	29
8.4	f	CFTR-RD	FVC 76%, FEV1 82%, MEF25 51%, LCI 7.0, S. aureus carrier	PS, pancreas elastase > 500	normal				p.Phe508del / WT	50	2012-12-04	nostril	-19	11	-6	nostril	-14	10	-7	2012-12-04	[µA/cm2]		28	80	80		43	37	20		29	12	10		19	46	49
8.4	m	non-CF	asthma, obstructive lung disease	PS, pancreas elastase > 500					WT / WT	31, 44	2015-06-16	nostril	-13	5	-11	nostril	-20	14	-14		[µA/cm2]
8.7	f	non-CF	normal	PS, pancreas elastase > 500					WT / WT	30, 34	2015-01-22	nostril	-10	6	-16	nostril	-12	7	-20		[µA/cm2]
8.8	f	non-CF	normal lung function	PS				Muenchhausen-by-proxi syndrome	WT / WT	11	2015-01-20	nostril	-18	7	-9	nostril	-14	6	-8	2015-01-20	[µA/cm2]		27	148	62		39	144	93		31	130	87	n.a.
9.1	m	non-CF	chronic cough, FVC 67%, FEV1 79%	BMI 15.4, recurrent abdominal pain, PS, pancreas elastase > 500					WT / WT	22	2017-10-11	nostril	-12	7	-8	nostril	-18	6	-15		[µA/cm2]
9.2	m	CFTR-RD	chronic cough, recurrent bronchitis, asthma bronchiale, normal lung function (FVC 119%, FEV1 118%, LCI 7)	often abdominal pain, pancreas elastase 350, BMI 20.0, reduced vitamin D serum level					WT / WT	15, 15	2015-10-13	nostril	-14	2	2	nostril	-18	4	0	2015-12-16	[µA/cm2]		10	44	28		18	112	30		12	4	27		22	22	45
9.2	f	CFTR-RD	periciliary disease (PCD)	PS, pancreas elastase > 500					WT / WT	44, 49	2016-04-21	nostril	-25	13	-1	nostril	-27	8	-4		[µA/cm2]
9.4	f	PS CF	rhinoconjunctivitis	PS, pancreas elastase > 500					WT / WT	17, 18, 38		nostril				nostril				2014-12-03	[µA/cm2]		9	3	7		7	3	2		16	3	2		1	7	2
9.5	f	PS CF	pneumonia, colonization with P. aeruginosa	PS, pancreas elastase > 500					p.Phe508del /3849+10 kb C-T	61; 34	2010-08-19	nostril	-40	22	3	nostril	-33	24	-4		[µA/cm2]
9.5	f	CFTR-RD	LCI 8.1; FVC 101%; FEV1 94%; recurrent bronchitis, frequent airway infections	BMI 15.6, PS, pancreas elastase > 500					p.Asp1152His / WT	9, 28	2015-04-07	nostril	-30	10	-3	nostril	-44	22	-5		[µA/cm2]
9.7	m	non-CF	chronic cough, FVC 83%, FEV1 77%	PS, pancreas elastase > 500					WT / WT	45,48, 26, 26	2011-02-02	nostril	-42	23	-37	nostril	-23	17	-21		[µA/cm2]
9.9	m	non-CF	chronic purulent bronchitis, recurrent pneumonias, intermittent colonization with P. aeruginosa	BMI 19.1, PS, pancreas elastase > 500					WT / WT	13	2011-11-03	nostril	-23	14	-15	nostril	-25	15	-16		[µA/cm2]
10.1	m	PS CF	nasal polyps, sinusitis, colonization with S. aureus	PS, pancreas elastase 480					p.Phe508del / WT	80, 86	2010-05-20	nostril		13	-1	nostril	-29	20	-1		[µA/cm2]
10.3	f	non-CF	chronic bronchitis, persistent cough, FVC 99%, FEV1 88%	PS, pancreas elastase > 500					WT / WT	10	2015-06-24	nostril	-19	6	-8	nostril	-15	7	-9		[µA/cm2]
10.5	m	non-CF	allergy, rhinoconjunctivitis, asthma	PS, pancreas elastase > 500					c.1210-12T(5) / WT	26, 32, 45	2011-05-26	nostril	-8	3	-7	nostril	-8	5	-9		[µA/cm2]
10.7	m	non-CF	chronic bacterial bronchitis, bronchiectasis, asthma bronchiale	BMI 15.5, PS, pancreas elastase > 500					WT / WT	8	2019-08-09	nostril	-6	2	-25	nostril	-7	2	-13		[µA/cm2]
10.7	m	non-CF	pansinusitis, persistent bronchitis, bronchiectasis	PS, pancreas elastase > 500				myelodysplastic syndrome, hematopoietic stem cell transplantation	WT / WT	14	2018-08-21	nostril	-15	4	-9	nostril	-16	5	-13		[µA/cm2]
10.7	m	non-CF	allergy, recurrent pneumonias, asthma bronchiale	PS, pancreas elastase 309, 250					WT / WT	25.28	2019-01-18	nostril	-15	4	-9	nostril	-16	5	-13	2015-05-20	[µA/cm2]		7	12	24		55	95	106		20	30	34	n.a.
10.9	m	CFTR-RD	recurrent bronchitis during infancy, now normal lung function (FVC 100%, FEV1 101%)	PS, abdominal pain, pancreas elastase > 500				dwarfism	p.Leu333Phe / WT	49, 60	2014-07-18	nostril	-24	16	-8	nostril	-34	25	-10		[µA/cm2]
11	f	non-CF	recurrent bronchitis, colonization with S. aureus, normal LCI 6.5	PS, abdominal pain, BMI 16.1, pancreas elastase 427					WT / WT	25	2015-08-03	nostril	-28	21	-36	nostril	-20	10	-20		[µA/cm2]
11.3	f	non-CF	allergy, rhinoconjuntivitis, chronic bronchitis, bronchiectasis, colonization with S. aureus, FVC 84%, FEV1 88%	BMI 15.4, PS, pancreas elastase > 500				hypogammaglobulinemia	WT / WT	29	2016-11-17	nostril	-3	3	-7	nostril	-16	7	-10		[µA/cm2]
11.3	f	non-CF	chronic bronchitis	BMI 19.4, PS, pancreas elastase > 500					WT / WT	30, 32	2014-06-24	nostril	-23	9	-5	nostril	-23	12	-13		[µA/cm2]
11.4	m	non-CF	bronchiectasis, reduced lung function (FVC 66%, FEV1 48%)	PI, pancreas elastase < 15					WT/WT	30	2020-05-08	nostril	-24	11	-25	nostril	-31	2	-3	2020-05-08	[µA/cm2]	90	19	70	90	92	31	88	138	60	20	48	60	38	2	26	54
11.4	f	non-CF		PS, abdominal pain, pancreas elastase > 500					WT / WT	31	2016-05-18	nostril	-18	10	-36	nostril	-30	12	-11		[µA/cm2]
11.7	f	non-CF	bronchiectasis	PS, pancreas elastase > 500					WT / WT	31, 34	2016-03-07	nostril	-21	18	-14	nostril	-19	12	-16		[µA/cm2]
11.8	f	non-CF	chronic productive cough	PS, pancreas elastase > 500, gastritis, duodenitis, colitis	splenomegaly			immune deficiency, hypogammaglobulinemia	WT / WT; STAT3 gain-of-function mutation	10, 10	2016-06-01	nostril	-16	6	-21	nostril	-19	7	-26		[µA/cm2]
11.8	m	non-CF		abdominal pain, PS, pancreas elastase > 500					WT / WT	39, 54	2014-06-24	nostril	-13	7	-20	nostril	-15	8	-16		[µA/cm2]
11.8	f	CFTR-RD		PS, recurrent abdominal pain, diarrhoea					WT / WT	40, 46	2015-06-19	nostril	-16	7	-5	nostril	-24	8	-3		[µA/cm2]
11.9	m	non-CF		PS, dystrophy, episode of ileus, abdominal pain and peritonitis, pancreas elastase > 500				IgA deficiency	WT / WT	50, 62		nostril				nostril				2018-07-05	[µA/cm2]		15	24	36		12	34	42		37	88	121
12	f	CFTR-RD	non-allergic asthma, bronchial obstruction; at time of diagnosis: FVC 67%, FEV1 67%	PS, pancreas lipomatosis, BMI 17.8					WT / WT	34, 60, 47, 49,43	2014-09-02	nostril	-32	8	-5	nostril	-35	15	-1		[µA/cm2]
12.2	m	non-CF		pancreas elastase 29, 150, > 500				anemia, psychosomatic disorder	WT / WT	51	2019-09-03	nostril	-17	6	-36	nostril	-20	15	-34		[µA/cm2]
12.3	m	CFTR-RD	recurrent pneumonias, chronic cough, LCI 9.4	recurrent abdominal pain, PS, pancreas elastase > 500					p.Ser466Ter-p.Arg1070Gln / WT	13	2020-02-14	nostril	-22	10	-5	nostril	-25	3	2	2020-02-14	[µA/cm2]	55	14	77	45	85	12	51	57	18	3	12	16	46	3	22	20
12.3	f	non-CF	asthma bronchiale, persistent atelectasis, recurrent pneumonias	PS, pancreas elastase > 500				pseudohypoaldosteronism, mental retardation, hardness of hearing	WT / WT (catch 22, Mikrodeletionssyndrom)	35, 46	2010-09-22	nostril	-17	0	-8	nostril	-20	0	-10		[µA/cm2]
12.5	m	non-CF		recurrent pancreatitis, chronic abdominal pain, pancreas elastase > 500					WT / WT	66.73	2017-05-16	nostril	-20	4	-20	nostril	-18	7	-23		[µA/cm2]
12.8	f	CFTR-RD	non-allergic asthma, bronchial obstruction	PS, pancreas elastase > 500					WT / WT	34, 60, 47, 49, 43	2015-06-17	nostril	-29	18	-10	nostril	-15	9	-7	2015-06-19	[µA/cm2]		0	28	38		4	12	20		1	10	24	n.a.
13.2	m	non-CF		PI, pancreas elastase <50				mental retardation	p.Phe508del / WT	39	2011-04-06	nostril	-22	17	-23	nostril	-21	10	-15		[µA/cm2]
13.4	m	non-CF		underweight, BMI 13, PS (pancreas elastase 450)					p.Gly576Ala / WT	55		nostril				nostril				2013-04-24	[µA/cm2]		12	53	24		49	23	16		54	109	39		27	46	20
13.5	m	CFTR-RD	periciliary disease (PCD)	PS, pancreas elastase > 500					WT / WT	48, 53	2016-04-21	nostril	-26	2	0	nostril	-27	10	-6		[µA/cm2]
13.6	f	non-CF	allergy, allergic rhinitis, asthma bronchiale	PS, pancreas elastase > 500					CFTRdele2,3 (21kb) / WT	30, 35	2011-02-15	nostril	-21	14	-11	nostril	-21	9	-5		[µA/cm2]
13.8	m	PS CF	nasal polyps, chronic colonization with S. aureus, FVC 85%, FEV1 91%	recurrent abdominal pain, GERD, PS, pancreas elastase > 500					WT / WT	43.54	2014-07-24	nostril	-13	6	-10	nostril	-16	10	-7	2014-07-24	[µA/cm2]		12	8	19
14.1	f	non-CF	allergy, asthma brochiale	abdominal pain, GERD, PS, pancreas elastase > 500					c.1210-12T(5) / WT	31.33	2019-07-12	nostril	-31	12	-31	nostril	-18	7	-28		[µA/cm2]
14.1	m	non-CF	bronchus malacia, ventilation inhomogeneity	PS, pancreas elastase > 500				Hodgkin lymphoma	WT / WT	30, 32, 54	2014-04-03	nostril	not feasible			nostril	-16	12	-37		[µA/cm2]
14.2	m	non-CF	asthma, allergy	BMI 18.6, PS, pancreas elastase > 500					WT / WT	50	2016-02-10	nostril	-13	11	-20	nostril	-23	13	-10		[µA/cm2]
14.2	f	PS CF	sinusitis, nasal polyps, allergy, asthma bronchiale,recurrent lower airway infections (5 pneumonias during childhood), normal lung function (LCI 7.9; FVC 103%; FEV1 108%);	BMI 18.2, PS, pancreas elastase > 500					p.Phe508del/p.Arg117His-c.1210-12T(7)	13, 36, 39, 21	2015-04-22	nostril	-19	18	0	nostril	-35	20	1		[µA/cm2]
14.3	f	non-CF	bronchiectasis	PS, pancreas elastase > 500					WT / WT	43, 47	2020-02-12	nostril	-9	8	-24	nostril	-9	6	-19		[µA/cm2]
14.4	f	non-CF	nasal polyps, pansinusitis, chronic rhinitis, bronchiectasis, colonization with P. aeruginosa, H. influenzae and S. aureus	PS, pancreas elastase > 500					WT / WT	10, 6	2017-10-26	nostril	-21	6	-16	nostril	-17	7	-3		[µA/cm2]
14.5	m	CFTR-RD	nasal polyps, chronic sinusitis	PS, pancreas elastase > 500					WT / WT	46, 53	2010-11-03	nostril	-31	29	-7	nostril	-25	18	-9		[µA/cm2]
14.7	m	non-CF		PS, pancreas elastase > 500	liver transplantation, biliary duct atresia			focal epilepsy	WT / WT	15	2015-08-31	nostril	-14	7	-14	nostril	-21	7	-11		[µA/cm2]
14.7	m	inconclusive	bronchiectasis, recurrent pneumonias	BMI 23.0, PS, pancreas elastase > 500				kidney dysplasia, kidney transplantation	WT / WT	70,63,57	2011-09-29	nostril	-9	5	0	nostril	-14	13	-21		[µA/cm2]
14.8	f	CFTR-RD	chronic bronchitis	PI, pancreatitis, pancreas elastase < 15					c.1210-12T(5) / WT	32, 33, 34, 32	2019-07-05	nostril	-10	7	-19	nostril	-9	4	-4	2018-10-04	[µA/cm2]	5	5	2	12	31	3	4	5	35	14	38	3
14.8	m	non-CF	recurrent pneumonias	PS, pancreas elastase > 500					WT / WT	40, 50, 41	2018-03-22	nostril	-27	8	-10	nostril	not feasible			2018-03-22	[µA/cm2]	58	25	20	37	17	68	32	40	21	32	32	42	n.a.
14.8	m	CFTR-RD		low pancreas elastase <100, episodes of abdominal pain					c.1210-12T(5) / p.Ala 1285Gln	9,11, 5		nostril				nostril				2018-09-13	[µA/cm2]		15	3	1		0	64	29		9	20	19
14.9	f	non-CF	rhinoconjunctivitis, asthma	PS, pancreas elastase > 500					WT / WT	40	2014-02-11	nostril	-15	11	-11	nostril	-13	10	-30		[µA/cm2]
15	m	non-CF	frequent airway infections, FVC 96%; FEV1 97%	PI, BMI 15.6: underweight, pancreas elastase 37				dystrophy	WT / WT	34, 59, 61	2015-02-26	nostril	-12	6	-8	nostril	-16	10	-1	2015-02-26	[µA/cm2]		42	227	114		56	113	54		43	37	128	n.a.
15	m	CFTR-RD	FVC 91%, FEV1 83%	BMI 20.7, recurrent abdominal pain, PI, pancreas elastase 72	cholelithiasis				c.489+1G>T / WT	40,23,91,22,78 (5 tests within 24 mo)	2011-09-28	nostril	-18	12	-3	nostril	-18	16	-6		[µA/cm2]
15.4	f	non-CF		abdominal pain, colitis ulcerosa, BMI 18, PS, pancreas elastase > 500				anemia	WT / WT	44	2016-12-01	nostril	-32	15	-12	nostril	-16	9	-14		[µA/cm2]
15.5	f	PS CF	allergic asthma bronchiale, FVC 114%, FEV1 94%	recurrent pancreatitis, BMI 21.0, PS, pancreas elastase > 500	cholecystitis, cholelithiasis			polyposis coli, urolithiasis	p.Asp1152His / p.Asp1152His	42, 27	2008-09-09	nostril	-12	11	-1	nostril	-15	13	0		[µA/cm2]
15.5	f	CFTR-RD	allergy, asthma, obstructive lung disease, reduced lung function	PS, pancreas elastase > 500				atopical dermatitis, allergy	WT / WT	43, 60	2013-04-25	nostril	-24	7	-5	nostril	-36	21	-4		[µA/cm2]
15.6	f	CFTR-RD	pansinusitis	PS, pancreas elastase > 500					WT / WT	28	2015-11-02	nostril	-23	11	-13	nostril	-19	12	-6		[µA/cm2]
15.8	m	non-CF	allergy, recurrent persistent bronchitis, obstructive lung disease, bronchus malacia, impaired lung function (FVC 88%, FEV1 62%)	GERD, BMI 27.2, PS, pancreas elastase > 500				hypertonia, Liddle syndrome	WT / WT	23, 50, 49	2014-08-27	nostril	-37	12	-12	nostril	-50	25	-19		[µA/cm2]
15.9	f	CFTR-RD	chronic sinusitis, nasal polyps, normal lung function (FVC 125%, FEV1 123%), chronic colonization with S. aureus	PS, pancreas elastase > 500, BMI 22.2					p.Phe508del / c.2752 - 15 C>G	53, 45, 59, 83	2011-05-03	nostril	-13	10	-13	nostril	-10	16	-3		[µA/cm2]
16.2	m	CFTR-RD	impaired lung function: FEV1 68%, FVC 58%	abdominal pain, steatorrhea, BMI 14.9, PS, pancreas elastase > 500				myotonia	WT / WT	56		nostril				nostril				2018-12-15	[µA/cm2]	28	22	8	18	5	3	3	8	6	2	4	0
16.3	m	non-CF	asthma bronchiale	PS, pancreas elastase > 500					CFTRdele2,3 (21 kb) / WT	41, 46, 63	2014-02-27	nostril	-23	10	-17	nostril	-36	29	-46		[µA/cm2]
16.3	m	non-CF	chronic cough	PS, pancreas elastase > 500					WT / WT	42. 43	2011-04-13	nostril	not feasible			nostril	not feasible				[µA/cm2]
16.3	m	non-CF	obstructive bronchitis, FVc 78%, FEV1 78%	recurrent abdominal pain, BMI 15.3, pancreas elastase 317				dystrophy	WT / WT	55, 58	2019-07-04	nostril	-26	23	-42	nostril	-22	8	-4		[µA/cm2]
16.4	m	non-CF	chronic sinusitis, recurrent pneumonias, allergic asthma bronchiale	PS, pancreas elastase > 500					WT / WT	20, 26, 29	2015-09-09	nostril	-9	6	-16	nostril	-17	7	-12		[µA/cm2]
16.4	f	non-CF	bronchiectasis, atelectasis, asthma	PS, pancreas elastase > 500					WT / WT	36, 44	2010-12-15	nostril	-10	4	-11	nostril	-10	5	-9		[µA/cm2]
16.4	m	CFTR-RD	nasal polyps, intermittent colonization with S. aureus, normal lung function (FVC 114%, FEV1 119%)	PS, abdominal pain in infancy, BMI 22.6, pancreas elastase > 500					p.Phe508del/p.Leu206Trp	48, 52, 61, 81	2011-03-16	nostril	-30	28	-9	nostril	-19	13	-2		[µA/cm2]
16.4	m	CFTR-RD	recurrent pneumothoraces	PS, pancreas elastase 465				Morbus Meulengracht	p.Phe994Cys / WT	54, 62	2015-09-23	nostril	-25	5	2	nostril	-14	2	2		[µA/cm2]
16.5	f	non-CF	nasal polyps, sinusitis, eosinophilic asthma bronchiale, bronchiectasis, chronic colonization with P. aeruginosa	PS, pancreas elastase > 500, GERD, underweight, BMI 15.2					WT / WT	11	2016-05-13	nostril	-19	4	-33	nostril	-18	5	-30		[µA/cm2]
16.5	f	CFTR-RD	normal lung function (FVC 114%, FEV1 130%)	recurrent severe abdominal pain, pancreas elastase 174 mg/g; low vitamin D serum levels, BMI 25.7	splenomegaly, steatosis hepatis				WT / WT	42	2014-11-03	nostril	-22	15	-5	nostril	-26	17	-4		[µA/cm2]
16.7	f	non-CF		PS, pancreas elastase > 500	nodule in liver				WT / WT	28, 30	2010-09-13	nostril	-18	16	-38	nostril	-11	15	-38		[µA/cm2]
16.7	m	non-CF	chronic cough	PS, pancreas elastase 480					WT / WT	35, 40	2017-03-08	nostril	-29	13	-18	nostril	-27	17	-4		[µA/cm2]
16.8	m	non-CF	bronchiectasis, recurrent pneumonias,	gastroesophageal reflux, GERD, PS, pancreas elastase > 500					WT / WT	6	2020-02-27	nostril	-14	8	-20	nostril	-18	9	-18		[µA/cm2]
16.8	m	non-CF	allergy, asthma bronchiale	GERD, PS, pancreas elastase > 500				preterm baby	WT / WT	23	2018-08-27	nostril	-18	7	-32	nostril	-21	8	-21		[µA/cm2]
16.8	m	non-CF		PS, pancreas elastase > 500	steatosis hepatis			ventricular septum defect	WT / WT	32	2017-12-01	nostril	-15	13	-28	nostril	-16	5	-6		[µA/cm2]
16.8	f	inconclusive		PS, pancreas elastase > 500	hepatitis				WT / WT	37, 48	2016-05-03	nostril	-10	2	-2	nostril	-21	2	-7		[µA/cm2]
16.8	m	non-CF		PS, BMI 19.3, pancreas elastase 487	liver fibrosis				WT / WT	51,44,44	2015-10-15	nostril	-13	10	-30	nostril	-18	2	-18		[µA/cm2]
16.9	m	non-CF		PS, pancreas elastase > 500	hepatitis, cholecystitis			anemia, renal insufficiency,	WT / WT (Klinefelter syndrome)	64, 66, 66, 67		nostril				nostril				2019-07-22	[µA/cm2]	2	3	14	6	76	29	119	84	20	0	22	9	70	9	107	80
17	m	non-CF	normal lung function, normal airway microbiology	PS, abdominal pain, pancreas elastase 427, BMI 17.7, underweight				refusal of food	WT / WT	73	2012-06-28	nostril	not feasible			nostril	-12	9	-30		[µA/cm2]
17	m	non-CF	nasal polyps, normal lung function (FVC 96%, FEV1 97%)	PS, pancreas elastase 460, normal sonogram					WT / WT	33, 39	2013-11-26	nostril	-14	12	-29	nostril	-14	15	-19		[µA/cm2]
17	m	CFTR-RD	normal lung function (FVC 92%, FEV1 100%, LCI 6.7)	PS, pancreas elastase > 500				dwarfism	c.1585-1G-A/ c.1210-12T(5)	35, 48	2012-12-02	nostril	-20	13	-6	nostril	-25	15	-7		[µA/cm2]
17.1	f	CFTR-RD	chronic cough	PS, pancreas elastase > 500			step-sister with CF		WT / WT	35, 44	2020-04-23	nostril	-18	6	-4	nostril	-19	4	0
17.3	f	non-CF	allergy, chronic bronchitis, asthma bronchiale	PS, pancreas elastase > 500				pseudohypoaldosteronism	WT / WT	20	2015-02-12	nostril	-12	2	-14	nostril	-20	5	-14		[µA/cm2]
17.4	m	non-CF	recurrent pneumothoraces, recurrent pleuropneumonias, chronic pansinusitis	PS, pancreas elastase > 500				valvular defect, hiatal hernia	WT / WT	49	2013-04-17	nostril	-17	13	-25	nostril	-12	11	-17	2013-04-07	[µA/cm2]		11	40	73		6	80	60		14	73	68		34	118	89
17.4	m	CFTR-RD		PS, pancreas elastase > 500	hepatitis, liver cirrhosis, portal hypertension, splenomegaly			nephrolithiasis	WT / WT	40, 67, 57, 59, 80	2010-12-16	nostril	-28	12	-6	nostril	-20	5	-6		[µA/cm2]
17.6	m	non-CF	allergy, asthma bronchiale	underweight, BMI 15.2, PS, pancreas elastase > 500					WT / WT	56, 58, 63	2019-03-15	nostril	-23	15	-17	nostril	-11	9	-10		[µA/cm2]
17.9	f	CFTR-RD	allergic rhinitis	PS, pancreas elastase > 500			twin sister pancreatitis		p.Phe508del / p.Arg117His-c.1210-12T(7)	66, 45	2020-03-11	nostril	-39	10	-2	nostril	-29	27	-13		[µA/cm2]
17.9	m	CFTR-RD	pansinusitis, nasal polyps, colonization with S. aureus, FVC 114%, FEV1 126%	PS, recurrent abdominal pain, often diarrhoea, pancreas elastase > 500	cholelithiasis				p.Phe508del / WT	49.33	2019-05-03	nostril	-32	17	-16	nostril	-39	21	-10	2019-05-03	[µA/cm2]	5	0	1	2	1	0	3	2	3	0	0	0	5	4	4	4
17.9	f	CFTR-RD	allergic rhinitis	acute pancreatitis, PS, pancreas elastase > 500					p.Phe508del / p.Arg117His-c.1210-12T(7)	58, 62	2020-03-11	nostril	-15	3	-5	nostril	-24	2	2		[µA/cm2]
17.9	m	PS CF	airwall thickening, chronic colonization with S. aureus	abdominal pain, obese, PS, pancreas elastase > 500	cholecystitis, cholelithiasis				c.249G>T,p.Glu831Ter/p.Glu831Ter	71, 89	2012-01-10	nostril	-7	8	2	nostril	-7	6	-3		[µA/cm2]
18	f	non-CF		acute pancreatitis, PS					p.Phe508del / WT	32	2010-06-25	nostril	-18	7	-21	nostril	-11	9	-10		[µA/cm2]
18.1	f	CFTR-RD	frequent upper airway infections, normal lung function, FVC 96%, FEV1 107%; chest roentgenogram: CN score 6, bronchial wall thickening, colonization with S. aureus	PS, pancreas elastase > 500	cholelithiasis				p.Phe508del / c.1210-12T(5)	35,32,67	2015-08-17	nostril	-22	15	-6	nostril	-11	6	1		[µA/cm2]
18.3	f	CFTR-RD	bronchiectasis, FVC 85%, FEV1 69%, intermittent detection of P. aeruginosa, purulent secretion	BMI 19,6, PS, pancreas elastase > 500					WT / WT	32;14	2011-01-26	nostril	-34	4	4	nostril	-12	8	3		[µA/cm2]
18.3	m	CFTR-RD	normal lung function (FVC 105%, FEV1 1010%)	PS, recurrent abdominal pain, pancreas elastase 258, BMI 25.7	cholelithiasis				WT/WT	51, 58	2019-11-15	nostril	-17	6	-4	nostril	-10	4	-4	2019-11-15	[µA/cm2]	18	3	7	13	23	3	9	13	59	7	32	29
18.5	f	non-CF		PS, recurrent pancreatitis, BMI 17, pancreas elastase 92					p.Asn1229Lys / WT	45	2020-04-14	nostril	-17	15	-21	nostril	-19	15	-26
18.6	m	non-CF	chronic bronchitis	PS, pancreas elastase > 500					WT / WT	43	2015-06-01	nostril	-11	3	-18	nostril	-12	7	-9		[µA/cm2]
18.8	f	non-CF	recurrent bronchitis	abdominal pain, PS, pancreas elastase > 500					WT / WT	50	2017-01-27	nostril	-25	13	-11	nostril	-23	14	-8	2017-01-27	[µA/cm2]		22	49	19		32	34	19		17	77	54		25	76	88
18.9	m	inconclusive	asthma bronchiale, ABPA	BMI 16.5, PS, pancreas elastase > 500					WT / WT	20,38,49, 49	2016-06-14	nostril	not feasible			nostril	not feasible				[µA/cm2]
19	m	non-CF		PI, pancreas elastase 74, recurrent abdominal pain, BMI 20.4				Asperger syndrome	WT / WT	63.34	2014-11-28	nostril	-21	10	-9	nostril	-15	8	-16		[µA/cm2]
19.5	m	non-CF	bronchiectasis	PS, pancreas elastase > 500					WT / WT	40, 42	2019-01-25	nostril	-13	7	-12	nostril	-9	8	-17		[µA/cm2]
19.9	m	PS CF	FVC 123%, FEV1 121%	PS, BMI 28.7					p.Phe508del / p.Arg117His-c.1210-12T(7)	35	2017-07-17	nostril	-31	10	1	nostril	-31	14	0		[µA/cm2]
20	m	non-CF	chronic cough, FVC 69%, FEV1 88%	often diarrhoea, PS, pancreas elastase > 500					WT / WT	63.38	2018-05-24	nostril	-15	13	-16	nostril	-18	12	-20		[µA/cm2]
20.5	f	CFTR-RD	chronic sinusitis, bronchiectasis, FEV1 66%	chronic abdominal pain, PI, underweight, BMI 17.0					WT / WT	35,44,53,55	2018-10-26	nostril	not feasible			nostril	-9	4	-6		[µA/cm2]
20.7	m	CFTR-RD	FVC 80%, FEV1 83%, reduced physical capacity	PS, pancreas elastase > 500, nausea after meals, recurrent abdominal pain, underweight, BMI 17.3				pseudohypoaldosteronism	WT / WT	54	2016-06-13	nostril	-23	0	-4	nostril	-28	0	-3		[µA/cm2]
21	f	PS CF	bronchiectasis, bronchial thickening, chronic colonization with S. aureus, reduced lung function (FVC 66%, FEV1 47%)	PS, pancreas elastase > 500, BMI 18.5	cholelithiasis				p.Phe508del / p.Thr1299Ile	52	15062014	nostril	-30	25	-5	nostril	-18	10	1	2014-06-05	[µA/cm2]		27	35	17		26	38	18		30	32	14	n.a.
21.2	f	non-CF	chronic sinusitis, primary ciliary dyskinesia, bronchiectasis, chronic colonization with S. aureus, FVC 92%, FEV1 91%	PS, pancreas elastase > 500, BMI 24.3					WT / WT	54	2015-11-04	nostril	-30	19	-17	nostril	-19	9	-11		[µA/cm2]
23.2	m	CFTR-RD	pansinusitis, bronchiectasis, recurrent airway infections	PS, pancreas elastase > 500					p.Arg1162Leu / WT	67	2019-04-12	nostril	-23	2	-5	nostril	-24	13	-7	2019-04-12	[µA/cm2]	28	11	62	4	43	27	94	55	7	16	16	12	37	17	17	23
23.6	m	non-CF	nasal polyps	chronic pancreatitis, PS	cholecystitis, cholelithiasis				WT / WT	12	2017-09-05	nostril	not feasible			nostril	-15	10	-16	2017-09-05	[µA/cm2]		5	37	11		20	55	25		54	113	46		54	122	83
25.3	f	PI CF	reduced lung function	PI, pancreas elastase < 50					c.3873+1 G>T / WT	88, 90	2018-05-29	nostril	-40	16	0	nostril	-22	15	0		[µA/cm2]
25.4	f	CFTR-RD	sinusitis, chronic bronchitis, chronic colonization with S. aureus, normal lung function (FVC 113%, FEV1 111%)	BMI 21.6, PS, pancreas elastase > 500	steatosis hepatis				p.Phe508del / p.Arg117His-c.1210-12T(7)	28	2016-04-21	nostril	-11	5	2	nostril	-26	22	7		[µA/cm2]
25.5	m	CFTR-RD	bronchiectasis, reduced lung function (FVC 57%, FEV1 57%)	BMI 25.6, PS, pancreas elastase > 500					WT / WT	74, 80	2015-09-10	nostril	-31	15	-8	nostril	-14	6	-3		[µA/cm2]
27.5	f	non-CF	bronchiectasis, asthma bronchiale, ABPA, FVC 113%, FEV1 96%	pancreas elastase 173					WT / WT	38, 49	2017-04-25	nostril	not feasible			nostril	-29	14	-25	2017-04-25	[µA/cm2]		7	46	54		34	64	102		33	175	149		18	12	37
27.5	f	CFTR-RD		PS, chronic pancreatitis, GERD					p.Phe508Cys / WT	52, 55	2018-06-11	nostril	-25	10	-4	nostril	-28	12	-5		[µA/cm2]
28.2	f	non-CF	bronchiectasis, lung transplanation, aspergillosis	PI				diabetes mellitus, hypertonia	WT / WT	34, 36	2016-06-20	nostril	-10	9	-11	nostril	-8	8	-10		[µA/cm2]
29.4	m	CFTR-RD	bronchiectasis, respiratory insufficiency, colonization with P. aeruginosa, FVC 48%, FEV1 24%	BMI 19.7, PS, pancreas elastase > 500					p.Gly178Arg / WT	40		nostril				nostril				2019-04-26	[µA/cm2]	13	55	6	6	6	29	35	30	0	3	1	7	n.a.
29.4	m	non-CF	bronchiectasis, chronic colonization with P. aeruginosa	GERD, BMI 15.9, PS, pancreas elastase > 500					WT / WT	28, 32	2010-09-08	nostril	-13	8	-20	nostril	-15	8	-30		[µA/cm2]
31	f	non-CF		PS, pancreatitis, gastritis				anemia	WT / WT	35, 38	2016-11-17	nostril	-4	4	-35	nostril	-3	6	-33		[µA/cm2]
31.2	f	non-CF	chronic bronchitis	PS, chronic gastritis				neuropathy, fatigue syndrome	WT / WT	31, 60	2014-11-06	nostril	-14	5	-8	nostril	-21	10	-11		[µA/cm2]
31.6	m	CFTR-RD	nasal polyps, sinusitis, bronchiectasis, asthma bronchiale, ABPA, FVC 98%, FEV1 84%	BMI 28.1, PS, pancreas elastase > 500					WT / WT	32.36	2018-05-29	nostril	-12	3	-4	nostril	-15	5	-3		[µA/cm2]
32	f	non-CF	recurrent airway infections	PS, pancreas elastase > 500					p.Phe508del / WT	54, 57	2016-08-26	nostril	-6	1	-3	nostril	-7	3	-13		[µA/cm2]
32.2	f	CFTR-RD	combined ENaC/CFTR dysfunction, no pulmonary symptoms	gastritis				muscular weakness	WT / WT	34, 37	2016-10-21	nostril	-5	0	-2	nostril	-3	0	-1		[µA/cm2]
33.1	f	non-CF	recurrent bronchitis during early childhood, FVC 115%, FEV1 119 % by age of 32 years	frequent episodes of diarrhoea during early childhood					WT / WT	36.41	2014-02-06	nostril	-12	5	-43	nostril	-20	15	-45		[µA/cm2]
33.5	f	non-CF	sinusitis, chronic bronchitis, mild bronchiectatis, colonization with Mycobacterium avium, FVC 112%, FEV1 110%	chronic pancreatitis, BMI 26				pregnancy	p.Arg117His-c.1210-12T(7) / p.Leu997Phe	52, 40	2019-05-14	nostril	-23	12	-16	nostril	-22	11	-15
33.7	f	CFTR-RD	chronic sinusitis, asthma bronchiale, ABPA, bronchiectasis, reduced lung function (FVC 69%, FEV1 45%)	BMI 27, PS, pancreas elastase > 500					p.Phe508del / p.Gly314Glu	39	2017-03-07	nostril	-27	18	-12	nostril	-39	20	-3		[µA/cm2]
35.6	f	PS CF	bronchiectasis, colonization with P. aeruginosa	PS, pancreas elastase > 500					p.Gly542Ter / 3849 + 10 kb C-T	57	2011-05-04	nostril	-61	21	-12		-58	46	-10
35.8	m	non-CF	chronic bronchitis	PI, recurrent episodes of acute pancreatitis					WT / WT	44,48,54,55	2018-01-31	nostril	-10	4	-8	nostril	-32			2018-01-31	[µA/cm2]	61	31	45	15	61	5	75	19	16	5	26	27	81	4	80	58
36.2	f	CFTR-RD	nasal polyps, sinusitis, asthma bronchiale						WT / WT	17	2015-12-14	nostril	-13	12	-7	nostril	-15	15	-10		[µA/cm2]
37.1	f	non-CF							WT / WT	42	2018-12-12	nostril	-7	6	-30	nostril	-10	7	-28		[µA/cm2]
37.5	m	non-CF	normal lung function (FVC 94%, FEV1 98%)		hepatitis			testis atrophy	c.1210-12T(5) / WT	26.28	2018-03-20	nostril	-7	4	-21	nostril	-5	3	-11		[µA/cm2]
38.2	f	non-CF	asthma bronchiale, normal lung function (FVC 88%, FEV1 85%)	BMI 19.3					WT / WT	29, 33	2017-07-17	nostril	-16	10	-19	nostril	-17	9	-25		[µA/cm2]
38.4	f	CFTR-RD	sinusitis		hepatomegaly				c.1210-12T(5) / WT	32	2017-07-04	nostril	-41	27	0	nostril	-25	16	-7		[µA/cm2]
38.9	m	non-CF	chronic pansinusitis, bronchiectasis, recurrent pneumonias, colonization with S. aureus, P. aeruginosa, A. fumigatus, FVC 56%, FEV1 32%	BMI 29.1				hypertonia, Swyer-James syndrome	WT / WT	13	2015-09-03	nostril	-10	3	-3	nostril	-8	1	-7		[µA/cm2]
39.3	m	CFTR-RD	chronic bronchitis				father of CFTR-RD patient		p.Phe994Cys / WT	48	2015-09-23	nostril	-11	2	0	nostril	-15	2	0		[µA/cm2]
40.5	m	non-CF	bronchiectasis, chronic colonization with P. aeruginosa, FVC 57%, FEV1 37%						WT / WT	26, 29	2017-02-06	nostril	-18	5	-16	nostril	-9	2	-5		[µA/cm2]
40.5	m	non-CF	normal lung function	PS, normal sonogram					p.Phe508del/p.lle1027Thr	62, 68	2018-07-10	nostril	-10	8	-11	nostril	-12	7	-12		[µA/cm2]
42.8	f	non-CF	bronchiectasis, asthma bronchiale, ABPA, FVC 113%, FEV1 96%	BMI 25.3					p.Arg75Gln/p.Val769Ile	5	2020-01-13	nostril	-13			nostril	-8	7	-21		[µA/cm2]
42.8	m	non-CF	sinusitis, bronchiectasis, chronic colonization with P. aeruginosa, eosinophilic asthma bronchiale, pulmonary hypertonia, FVC 47%, FEV1 29%	BMI 21.7, PS, pancreas elastase > 500					WT / WT	52	2019-08-26	nostril	-13	7	-8	nostril	-15	5	-8		[µA/cm2]
42.8	f	PI CF	reduced lung function (FVC 87%, FEV1 67%), bronchiectasis, asthma, colonization with P. aeruginosa, pansinusitis	PI, BMI 20.2, long-life avoidance of fat food					c.1585-2 A>G / c.2012delT	91	2018-04-10	nostril	-31	15	1	nostril	-30	24	1		[µA/cm2]
43.9	m	non-CF	pansinusitis, bronchiectasis, FVC 89%, FEV1 88%	BMI 29.4, PS, pancreas elastase > 500				hypertonia	WT / WT	19	2015-07-24	nostril	-16	10	-8	nostril	not feasible				[µA/cm2]
44.3	f	non-CF	nasal polyps, sinusitis						p.Phe508del / WT	43	2011-01-27	nostril	-20	14	-23	nostril	-24	21	-13		[µA/cm2]
44.7	f	CFTR-RD	nasal polyps, bronchiectasis, chronic colonization with S. aureus, normal spirometry (FVC 114%, FEV1 105%)	BMI 26.3, PS, pancreas elastase > 500	cholelithiasis		siblings with bronchiectasis		p.Phe508del/p.Asp1152His	19	2018-11-07	nostril	-42	36	-16	nostril	-16	15	-9		[µA/cm2]
45.2	m	non-CF	allergy, bronchiectasis, normal lung function (FVC 101%, FEV1 104%)	GERD, BMI 28.0				mevalonate kinase deficiency	WT / WT	27, 34	2018-07-30	nostril	-15	15	-45	nostril	-26	22	-29		[µA/cm2]
45.4	f	non-CF	allergic asthma bronchiale, nasal polyps, pansinusitis, bronchiectasis, FVC 114%, FEV1 85%	BMI 23.3, PS, pancreas elastase > 500					c.1210-34 / c.1210-12T(5)	32.37	2016-09-13	nostril	-24	10	-25	nostril	-25	12	-6		[µA/cm2]
45.4	f	non-CF	bronchiectasis	GERD	cholecystitis				WT / WT	28, 32	2019-09-05	nostril	-12	4	-13	nostril	-16	7	-30		[µA/cm2]
45.5	f	non-CF	bronchiectasis	underweight					WT / WT	46, 50	2015-01-20	nostril	-16	7	-10	nostril	-15	4	-3		[µA/cm2]
45.6	m	non-CF		PI					WT / WT	26, 27, 32	2017-11-15	nostril	-17	14	-26	nostril	-18	14	-26		[µA/cm2]
45.9	f	non-CF	allergy, eosinophilic asthma bronchiale, normal lung function (FVC 113%, FEV1 109%), chronic colonization with S. aureus	BMI 28.2					p.Phe508del / c.1210-12T(5)	23	2018-02-19	nostril	not feasible			nostril	-9	5	-12		[µA/cm2]
46	m	non-CF	bronchiectasis	BMI 26.8					WT / WT	26, 33	2016-01-11	nostril	-22	14	-36	nostril	-20	7	-6		[µA/cm2]
48	m	Pseudohypoaldosteronism	recurrent bronchitis, obstructive lung disease, normal lung function			infertile		since 2010 hypertension, 2014 cerebral infarct, repeated salt dehydration in infancy	WT / WT (SCNN1A p.Phe61Leu)	age 1 - 15 years: 66, 60, 54, 40, 60, 40, 96, 52, 39, 89, 96, 33, 30, 110, 60; age 48 years: 78	2015-07-06	nostril	1	0	-2	nostril	2	0	-3		[µA/cm2]
48.2	m	inconclusive	allergy, recurrent polypectomies, recurrent nasal polyps, sinusitis, bronchiectasis, chronic colonization with P. aeruginosa	BMI 23.0				lung transplant recipient	WT / WT	9	2015-08-27	nostril	not feasible			nostril	not feasible				[µA/cm2]
48.7	m	non-CF	bronchiectasis, recurrent pneumonias, colonization with S. aureus and P. aeruginosa	BMI 28.4	chronic hepatitis B			IgG4 deficiency	WT / WT	14	2015-11-11	nostril	-22	17	-20	nostril	-22	12	-16		[µA/cm2]
48.9	m	non-CF	asthma bronchiale, bronchiectasis						WT / WT	32	2017-06-14	nostril	-17	9	-29	nostril	-28	6	-15		[µA/cm2]
50.1	m	non-CF	chronic sinusitis, bronchiectasis	BMI 21.9					WT / WT	66	2016-05-20	nostril	-19	3	-16	nostril	-17	5	-10		[µA/cm2]
50.4	m	non-CF	chronic bronchitis, asthma bronchiale, normal lung function (FVC 111%, FEV1 107%)	abdominal pain, chronic pancreatitis, GERD, BMI 26					c.1210-12T(5) / WT	12	2016-12-12	nostril	-21	13	-14	nostril	-22	9	-1		[µA/cm2]
51.1	f	non-CF	bronchiectasis, reduced lung function (FVC 65%, FEV1 35%), chronic infection with P. aeruginosa, recurrent pneumothoraces, eosinophilic asthma bronchiale	BMI 19.1					p.Gly576Ala / WT	52, 54, 55	2017-04-18	nostril	-15	7	-21	nostril	-12	10	-27	2017-04-18	[µA/cm2]	27	42	31	91	45	58	81	195	99	37	107	174	n.a.
52.1	m	non-CF	pansinusitis			infertile			p.Arg117His-c.1210-12T(7)/WT	36.48		nostril				nostril				2019-01-25	[µA/cm2]	63	25	70	90	21	40	57	61	34	6	30	30	22	12	20	25
52.7	f	CFTR-RD		recurrent abdominal pain, underweight				hypertonia, chronic kidney disease	WT / WT	45, 51	2016-09-09	nostril	-12	3	-3	nostril	-16	1	-2		[µA/cm2]
53.6	f	non-CF	bronchiectasis, FVC 70%, FEV1 37%	underweight					WT / WT	36	2010-06-15	nostril	-20	10	-16	nostril					[µA/cm2]
54.9	m	non-CF	nasal polyps, pansinusitis	steatorrhea					WT / WT	30, 35	2019-10-25	nostril	-4	2	-7	nostril	-8	4	-9	2019-11-29	[µA/cm2]	1	1	3	3	no epithelium
55.7	f	non-CF	nasal polyps, sinusitis, bronchiectasis, chronic colonization with P. aeruginosa	BMI 20.4					WT / WT	82, 32	2015-10-15	nostril	-15	4	-3	nostril	-14	7	-20		[µA/cm2]
56.7	f	non-CF	nasal polyps, sinusitis, bronchiectasis	BMI 24.8	cholelithiasis				WT / WT	11	2015-10-27	nostril	-6	2	-15	nostril	not feasible				[µA/cm2]
57.7	m	CFTR-RD	bronchiectasis, recurrent pneumonias					hypertonia	WT / WT, carrier of the hyperactive W493R SCNN1A variant	42	2013-11-04	nostril	-12	8	-5	nostril	-18	12	-6		[µA/cm2]
57.9	f	CFTR-RD	bronchiectasis, chronic cough						WT / WT	35.37	2016-10-07	nostril	-11	3	-3	nostril	-23	3	-1		[µA/cm2]
58.6	f	non-CF	bronchiectasis						WT / WT, carrier of the hyperactive W493R SCNN1A variant	27	2013-11-04	nostril	-21	19	-24	nostril	-27	24			[µA/cm2]
59	f	CFTR-RD	bronchiectasis, global respiratory insufficiency, chronic infection with P. aeruginosa, 2016 lung transplant recipient	18.0					WT / WT	17	2015-11-09	nostril	-31	19	-3	nostril	-26	8	-2		[µA/cm2]
59.1	f	non-CF	normal lung function	colitis				diabetes mellitus, hypertonia	CFTRdele2,3 (21 kb) / WT	30, 32	2018-08-24	nostril	-27	7	-16	nostril	-11	9	-20		[µA/cm2]
59.5	f	non-CF	normal lung function (FVC 88%, FEV1 98%)	BMI 22, normal sonogram					WT / WT (p.Ala281Pro in SCNN1A)	37	2017-10-30	nostril	-20	7	-6	nostril	-16	10	-21		[µA/cm2]
59.5	m	non-CF	bronchiectasis						p.Gly437Asp / p.Val1293Ile	27, 31	2020-05-08	nostril	-8	2	-27	nostril	-6	1	-22
59.5	f	non-CF	primary ciliary dyskinesia, bronchiectasis, nasal polyps, colonization with P. aeruginosa						WT / WT (PCD: 2 mutations in DNAH5)	54, 58	2015-07-16	nostril	-18	6	-7	nostril	-19	7	-14		[µA/cm2]
59.7	m	non-CF	bronchiectasis, chronic colonization with P. aeruginosa, COPD Gold IV	obese, BMI 30.7					WT / WT	28	2015-09-17	nostril	-12	8	-27	nostril	not feasible				[µA/cm2]
60.1	f	non-CF	pansinusitis, bronchiectasis, asthma bronchiale, ABPA	BMI 20.6					WT / WT	39	2015-08-31	nostril	-12	8	-15	nostril	-21	7	-7		[µA/cm2]
60.1	f	CFTR-RD	bronchiectasis, atelectasis					CVID	WT / WT	68, 45	2015-03-09	nostril	-19	9	-5	nostril	-36	8	-2		[µA/cm2]
61.8	f	non-CF	bronchiectasis						WT / WT		2014-02-06	nostril	-16	13	-26	nostril	-18	12	-24		[µA/cm2]
62.3	f	CFTR-RD	bronchiectasis, chronic colonization with P. aeruginosa, FVC 150%, FEV1 100%	BMI 22.9				mild chronic renal insufficiency	WT / WT	46	2014-10-22	nostril	-14	6	-5	nostril	-36	21	-7		[µA/cm2]
62.7	f	non-CF	nasal polyps, sinusitis, saily productive sputum, allergy	BMI 19					WT / WT	49.33	2019-05-16	nostril	-8	4	-38	nostril	-11	6	-54		[µA/cm2]
64.8	f	CFTR-RD	chronic pansinusitis, bronchiectasis	BMI 22.2				arthritis	WT / WT	36	2015-08-27	nostril	-22	2	-5	nostril	-19	9	-4		[µA/cm2]
64.9	m	non-CF	pansinusitis, respiratory insufficiency, bronchiectasis, chronic colonization with P. aeruginosa, allergic asthma bronchiale	BMI 21.4		infertile			WT / WT		2019-03-29	nostril	-12	7	-4	nostril	-17	9	-18		[µA/cm2]
65	m	PS CF	nasal polyps, pansinusitis	long-life avoidance of fat food					p.Phe508del / WT	91, 99	2017-03-02	nostril	-12	3	-2	nostril	-14	6	-4	2017-03-02	[µA/cm2]	11	4	5	3	9	7	12	3	11	8	14	3	n.a.
68.5	m	inconclusive	bronchiectasis, chronic bronchitis, COPD GOLD II	colitis ulcerosa				renal insufficiency, hypertonia	WT / WT		2015-01-15	nostril	not feasible			nostril	not feasible				[µA/cm2]
69.2	m	non-CF	bronchiectasis, FVC 104%, FEV1 68%	BMI 40.5					p.Phe508del / WT	31	2019-06-06	nostril	-9	4	-12	nostril	-12	6	-14		[µA/cm2]
75.5	m	non-CF	bronchiectasis						WT / WT	28, 30	2014-02-27	nostril	-15	8	-15	nostril	-10	3	-23		[µA/cm2]
											not feasible; no respiratory epithelium detected in nostril									n.a.; tracing of the biopsy not analyzed because of technical artefacts
